# Supplementary material for: Benchmarking a targeted 16S ribosomal RNA gene enrichment approach to reconstruct ancient microbial communities
Source: PeerJ journal article supplement (doi:10.7717/peerj.16770), 2024-03-01

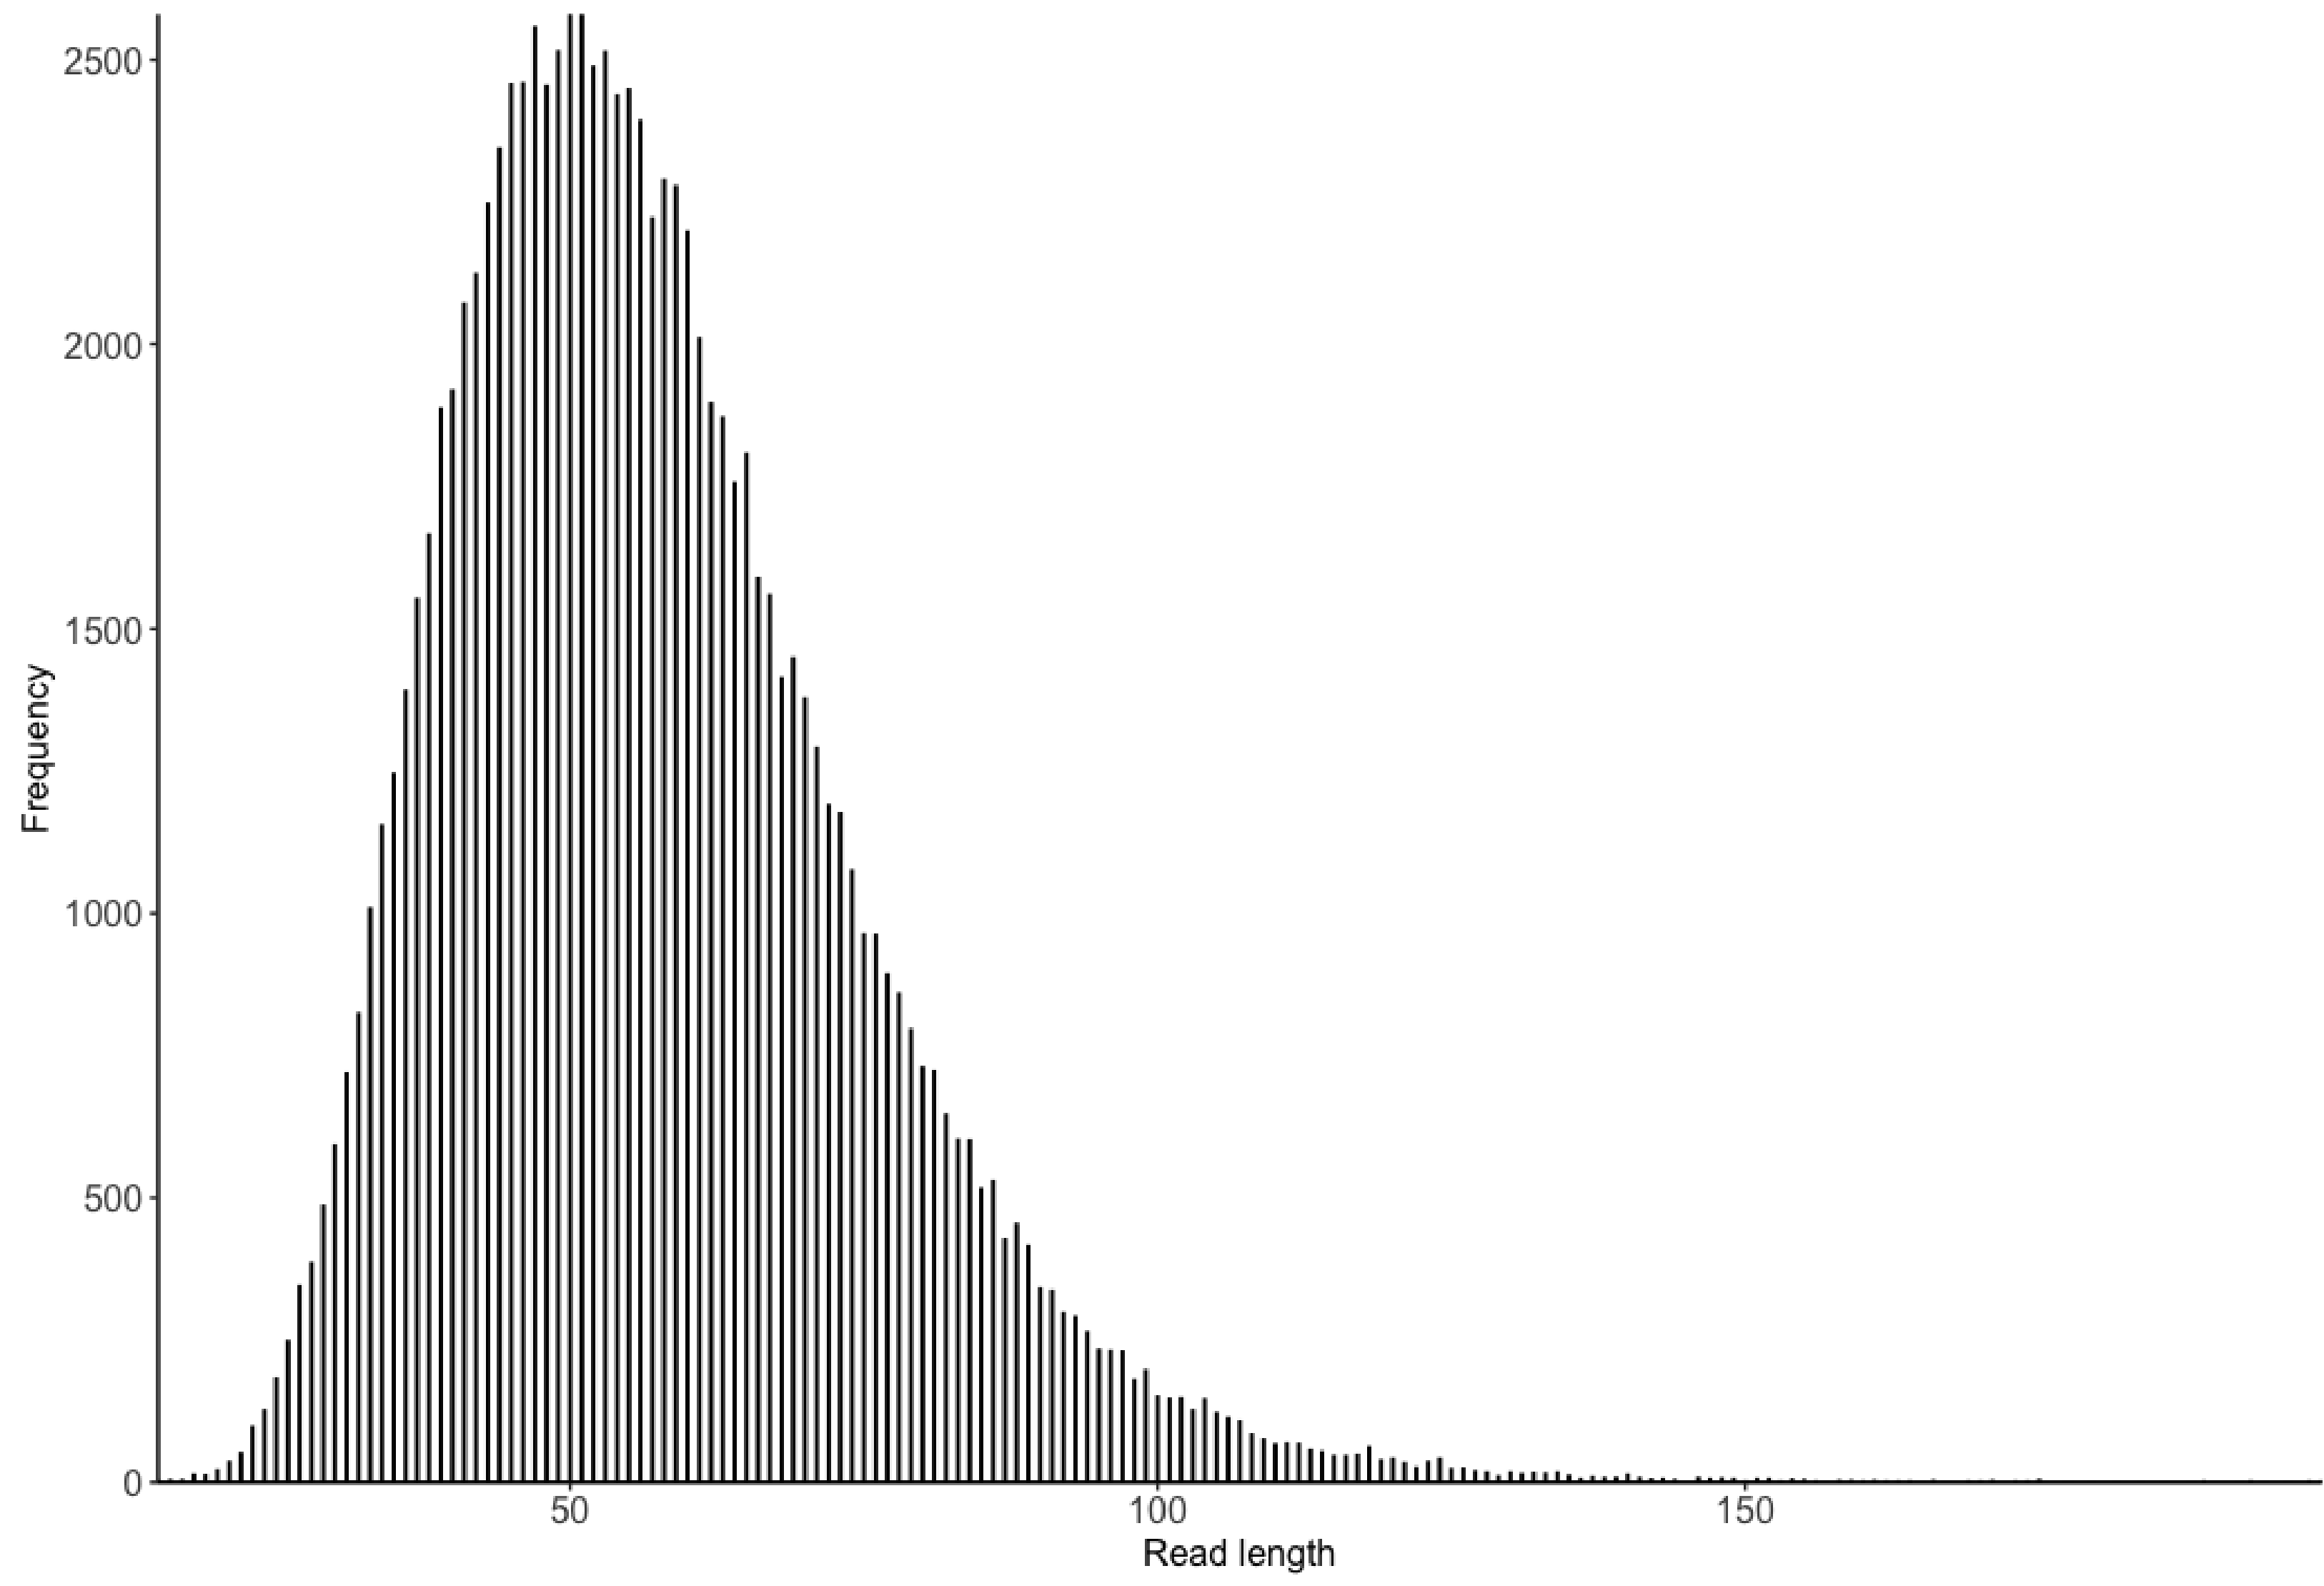

Supplement: Figure_S1.pdf [file Figure_S1.pdf]
