# Supplementary material for: Benchmarking a targeted 16S ribosomal RNA gene enrichment approach to reconstruct ancient microbial communities
Source: PeerJ. 2024 Mar 1;12:e16770. doi: 10.7717/peerj.16770 (PMC10911074; doi:10.7717/peerj.16770)
Supplement: Supplemental Information 6 [file peerj-12-16770-s006.xlsx]

## Sheet: S1
Table S1. Metadata for all samples
SampleID	LibraryType	SRR_Accession	BioProject_Accession	BioSample_Accession	Continent	Country	Study
A12014_Meso	16S	NA	ERP002107	NA	Europe	Poland	Adler-etal-2013
A12017_Meso	16S	NA	ERP002107	NA	Europe	Poland	Adler-etal-2013
A12826_LBK	16S	NA	ERP002107	NA	Europe	Germany	Adler-etal-2013
A12829_LBK	16S	NA	ERP002107	NA	Europe	Germany	Adler-etal-2013
A12873_Chimp	16S	NA	ERP002107	NA	Africa	Sierra_Leone	Adler-etal-2013
A13204_Sf	16S	NA	ERP002107	NA	Africa	South_Africa	Adler-etal-2013
A13208_Sf	16S	NA	ERP002107	NA	Africa	South_Africa	Adler-etal-2013
A13209_Sf	16S	NA	ERP002107	NA	Africa	South_Africa	Adler-etal-2013
A13210_Sf	16S	NA	ERP002107	NA	Africa	South_Africa	Adler-etal-2013
A13213_Sf	16S	NA	ERP002107	NA	Africa	South_Africa	Adler-etal-2013
A8812_Jewbury_16S	16S	NA	ERP002107	NA	Europe	England	Adler-etal-2013
A8824_Jewbury_16S	16S	NA	ERP002107	NA	Europe	England	Adler-etal-2013
IndustrialRevolution1	16S	NA	ERP002107	NA	Europe	Germany	Adler-etal-2013
IndustrialRevolution2	16S	NA	ERP002107	NA	Europe	Germany	Adler-etal-2013
IndustrialRevolution3	16S	NA	ERP002107	NA	Europe	Germany	Adler-etal-2013
A12014_HG-Enriched	Enriched	SRR26909298	PRJNA1031168	SAMN38353740	Europe	Poland	This study
A12017_EuroHG2-Enriched	Enriched	SRR26909297	PRJNA1031168	SAMN38353741	Europe	Poland	This study
A12826_LBK1-Enriched	Enriched	SRR26909294	PRJNA1031168	SAMN38353742	Europe	Germany	This study
A12829_LBK2-Enriched	Enriched	SRR26909293	PRJNA1031168	SAMN38353743	Europe	Germany	This study
A12873_Chimp-Enriched	Enriched	SRR26909292	PRJNA1031168	SAMN38353744	Africa	Sierra_Leone	This study
A13204_AfrPP2-Enriched	Enriched	SRR26471924	PRJNA1031168	SAMN37928877	Africa	South_Africa	This study
A13208_AfrSF2-Enriched	Enriched	A13208_frSF2_55c_SortMeRNA	PRJNA1031168	SAMN37928878	Africa	South_Africa	This study
A13209_AfrSF3-Enriched	Enriched	A13209_frSF3_55c_SortMeRNA	PRJNA1031168	SAMN37928879	Africa	South_Africa	This study
A13210_AfrSF4-Enriched	Enriched	SRR26909291	PRJNA1031168	SAMN38353745	Africa	South_Africa	This study
A13213_AfrPP1-Enriched	Enriched	SRR26471915	PRJNA1031168	SAMN37928894	Africa	South_Africa	This study
A13232_IndRev2-Enriched	Enriched	SRR26909289	PRJNA1031168	SAMN37928895	Europe	Germany	This study
A13234_IndRev3-Enriched	Enriched	SRR26909289	PRJNA1031168	SAMN37928896	Europe	Germany	This study
A13344_ET11_EBC-Enriched	Enriched	SRR26909288	PRJNA1031168	SAMN37928897	Europe	Germany	This study
A8812_JewBury-Enriched	Enriched	SRR26909287	PRJNA1031168	SAMN38353749	Europe	England	This study
A8824_JewBury2-71125-Enriched	Enriched	SRR26909296	PRJNA1031168	SAMN38353750	Europe	England	This study
AFR8_EBC-9076-Enriched	Enriched	SRR26909295	PRJNA1031168	SAMN38353751	Australia	Australia	This study
A13204_frPP2_55c	Enrichment-55C	SRR26471925	PRJNA1031168	SAMN37928876	Africa	South_Africa	This study
A13208_frSF2_55c	Enrichment-55C	SRR26471905	PRJNA1031168	SAMN37928882	Africa	South_Africa	This study
A13209_frSF3_55c	Enrichment-55C	SRR26471921	PRJNA1031168	SAMN37928888	Africa	South_Africa	This study
A13213_frPP1_55c-Enriched	Enrichment-55C	SRR26471914	PRJNA1031168	SAMN37928895	Africa	South_Africa	This study
A13204_frPP2_65c	Enrichment-65C	SRR26471908	PRJNA1031168	SAMN37928879	Africa	South_Africa	This study
A13208_frSF2_65c	Enrichment-65C	SRR26471903	PRJNA1031168	SAMN37928884	Africa	South_Africa	This study
A13209_frSF3_65c	Enrichment-65C	SRR26471918	PRJNA1031168	SAMN37928891	Africa	South_Africa	This study
A13213_frPP1_65c-Enriched	Enrichment-65C	SRR26471911	PRJNA1031168	SAMN37928897	Africa	South_Africa	This study
A12014_EuroHG1-UeWGA	UeWGA	SRR26471917	PRJNA685265	SAMN37928875	Europe	Poland	Weyrich-etal-2017
A12017_EuroHG2-UeWGA	UeWGA	SRR26471918	PRJNA685265	SAMN37928876	Europe	Poland	Weyrich-etal-2017
A12826_LBK1-UeWGA	UeWGA	SRR26471919	PRJNA685265	SAMN37928877	Europe	Germany	Weyrich-etal-2017
A12829_LBK2-UeWGA	UeWGA	SRR26471920	PRJNA685265	SAMN37928878	Europe	Germany	Weyrich-etal-2017
A13204_AfrPP2-UeWGA	UeWGA	SRR26471907	PRJNA685265	SAMN37928880	Africa	South_Africa	Weyrich-etal-2017
A13208_AfrSF2-UeWGA	UeWGA	SRR26471908	PRJNA685265	SAMN37928881	Africa	South_Africa	Weyrich-etal-2017
A13209_AfrSF3-UeWGA	UeWGA	SRR26471917	PRJNA685265	SAMN37928892	Africa	South_Africa	Weyrich-etal-2017
A13210_AfrSF4-UeWGA	UeWGA	SRR13263138	PRJNA685265	SAMN17080929	Africa	South_Africa	Weyrich-etal-2017
A13213_AfrPP1-UeWGA	UeWGA	SRR26471910	PRJNA685265	SAMN37928898	Africa	South_Africa	Weyrich-etal-2017
A13232_IndRev2-UeWGA	UeWGA	SRR13263119	PRJNA685265	SAMN17080931	Europe	Germany	Weyrich-etal-2017
A13234_IndRev3-UeWGA	UeWGA	SRR13263120	PRJNA685265	SAMN17080932	Europe	Germany	Weyrich-etal-2017
A8812_JewBury-UeWGA	UeWGA	SRR13263126	PRJNA685265	SAMN17080938	Europe	England	Weyrich-etal-2017
A8824_JewBury2-UeWGA	UeWGA	SRR13263127	PRJNA685265	SAMN17080939	Europe	England	Weyrich-etal-2017
AFR8-EBC-UeWGA	UeWGA	SRR13263121	PRJNA685265	SAMN17080933	Australia	Australia	Weyrich-etal-2017
CHIMP-UeWGA	UeWGA	SRR13263122	PRJNA685265	SAMN17080934	Africa	Sierra_Leone	Weyrich-etal-2017

## Sheet: S2
Table S2. Simulated 165 metagenome composition
Taxon	Abundance
Bacillus anthracis	0.05
Corynebacterium matruchotti	0.025
Corynebacteirum durum	0.025	Removed for species exclusion experiment
Escherichia coli	0.025
Fretibacterium fastidiosum	0.025
Johnsonella ignava	0.025	Removed for species exclusion experiment
Methanobrevibacter oralis	0.125
Moranella endobium	0.025
Neissera sicca	0.075	Removed for species exclusion experiment
Rothia aeria	0.195
Staphylococcus aureus	0.005
Streptococcus mitis	0.04	Removed for genus exclusion experiment
Streptococcus mutans	0.01	Removed for genus exclusion experiment
Streptococcus oralis	0.05	Removed for genusexclusion experiment
Streptococcus sanguinis	0.05	Removed for genus exclusion experiment
Streptococcus suis	0.1	Removed for species and genus exclusion experiment
Thiomagarito namibiensis	0.05
Treponema denticola	0.05
Yersinia pestis	0.05

## Sheet: S3
Table S3. Enrichment statistics for subsampled, 16S-enriched samples
Sample	total sequences	putative 16S fragments	% putative 16S fragments	%duplicates	%GC	avg_sequence_length
A12014_EuroHG1_16S_Enriched	100000	68369	0.684	0.915	0.49	81
A12017_EuroHG2_16S_Enriched	93208	64593	0.693	0.657	0.52	80
A12826_LBK1_16S_Enriched	100000	54794	0.548	0.283	0.52	67
A12829_LBK2_16S_Enriched	100000	52971	0.53	0.089	0.51	68
A12873_Chimp_16S_Enriched	100000	47463	0.475	0.915	0.54	50
A13204_AfrPP2_16S_Enriched	100000	52010	0.52	0.437	0.49	71
A13208_AfrSF2_16S_Enriched	100000	59146	0.591	0.208	0.5	78
A13208_AfrSF3_16S_Enriched	100000	51305	0.513	0.106	0.51	63
A13210_AfrSF4_16S_Enriched	100000	56234	0.562	0.875	0.44	65
A13213_EuroPP1_16S_Enriched	100000	52847	0.528	0.104	0.5	76
A13232_IndRev1_16S_Enriched	100000	48456	0.485	0.217	0.5	88
A13234_IndRev2_16S_Enriched	100000	49201	0.492	0.093	0.52	70
A8812_Jewbury1_16S_Enriched	51926	36720	0.707	0.213	0.5	75
A8824_Jewbury1_16S_Enriched	71125	60560	0.851	0.543	0.51	85
AFR8_EBC_16S_Enriched	9076	5388	0.594	0.97	0.52	86
Average all	88356	50670	0.58	0.44	0.5	73
Average excluding EBCs	94019	53905	0.57	0.4	0.5	73

## Sheet: S4
Table S4. Enrichment statistics for hybridization temperature test
Sample	Total reads	Putative 16S reads	% putative 16S reads	%duplicates	%GC	avg_sequence_length
13204_AfrPP2_unenriched	1750000	2767	0.0016	0.0352	49	54
13204_AfrPP2_55°C	1790862	509206	0.2843	0.8054	49	69
13204_AfrPP2_65°C	1659594	854834	0.5182	0.8581	50	77
13208_AfrPP2_unenriched	2000000	3531	0.0018	0.0134	49	58
13208_AfrPP2_55°C	2105596	539978	0.2564	0.5298	48	74
13208_AfrPP2_65°C	1897804	1114041	0.587	0.7182	50	86
13209_AfrPP2_unenriched	2050000	2265	0.0011	0.0089	53	51
13209_AfrPP2_55°C	2185137	513106	0.2348	0.3497	51	62
13209_AfrPP2_65°C	1869330	948471	50.74"	0.5266	51	68
13213_AfrPP2_unenriched	2350000	4361	0.0019	0.0184	50	60
13213_AfrPP2_55°C	2725464	738998	0.2711	0.436	49	73
13213_AfrPP2_65°C	2015235	1056566	0.5243	0.5566	50	83
Average un-enriched	2037500	3231	0.0016	0.019	50	56
Average un-enriched 55°C	2201765	575322	0.2617	0.5302	49	69
Average un-enriched 65°C	1858016	993478	0.5442	0.6649	50	79

## Sheet: S5
Table S5. Alpha diversity
Pairwise comparisons	Taxonomic level: Feature	metric: observed features
Group 1	Group 2	H	p-value	q-value
55C (n=4)	65C (n=4)	0	1	1
Pairwise comparisons	Taxonomic level: Genus	metric: observed genera
Group 1	Group 2	H	p-value	q-value
55C (n=4)	65C (n=4)	0.0853659	0.770153	0.770153

## Sheet: S6
Table S6. Alpha diversity statistics by library method
Pairwise comparisons	Taxonomic level: Feature	metric: observed features	test: Kruskal-Wallis
Group 1	Group 2	H	p-value	q-value
16S (n=15)	Enriched (n=14)	15.6429	7.65009e-05	7.65009e-05
16S (n=15)	Shotgun (n=13)	20.2111	6.93482e-06	2.08045e-05
Enriched (n=14)	Shotgun (n=13)	16.2519	5.54539e-05	7.65009e-05
Pairwise comparisons	Taxonomic level: Genus	metric: observed genera	test: Kruskal-Wallis
Group 1	Group 2	H	p-value	q-value
16S (n=15)	Enriched (n=14)	0.0043048	0.947688	0.947688
16S (n=15)	Shotgun (n=13)	11.492	0.000698977	0.00104847
Enriched (n=14)	Shotgun (n=13)	14.2041	0.000164009	0.000492026

## Sheet: S7
Table S7. Mean proportions of taxonomic assignments at given taxonomic ranks for 16S enrichment and unenriched shotgun approaches
Method	Average 16S enrichment	Average UeWGA
Total # reads	94019	94019
Total reads used for alignment	53905	94019
# reads aligned	52823	37856
% aligned	0.0008	0.59
% assigned domain	0.064	0.017
% assigned phylum	0.046	0.021
% assigned class	0.093	0.027
% assigned order	0.183	0.032
% assigned family	0.21	0.039
% assigned genus	0.359	0.208
% assigned species	0.018	0.648
